# Supplementary material for: Thermal Inactivation Kinetics of Kudzu (Pueraria lobata) Polyphenol Oxidase and the Influence of Food Constituents
Source: MDPI journal article supplement (doi:10.3390/foods10061320), 2021-06-08
Supplement: s1 [file s1]

## Supplementary Material

### Thermal Inactivation Kinetics of Kudzu (*Pueraria lobata*)

### Polyphenol Oxidase and the Influence of Food Constituents

Table S1. Purification of PPO from kudzu

| Purification step                                             | Total activity (U) | Total protein (mg) | Specific activity (U/mg ) | Recovery (%) | Purification (fold) |
|---------------------------------------------------------------|--------------------|--------------------|---------------------------|--------------|---------------------|
| Crude extract                                                 | 131,333 ± 1154     | 148.2 ± 2.4        | 886 ± 22                  | 100.0 ± 0.9  | 1.0 ± 0.02          |
| (NH <sub>4</sub> ) <sub>2</sub> SO <sub>4</sub> precipitation | 63,135 ± 852       | 13.9 ± 0.1         | 4,553 ± 71                | 48.1 ± 0.6   | 5.1 ± 0.1           |
| DEAE sepharose fast flow column                               | 43,200 ± 216       | 1.3 ± 0.04         | 34,001 ± 1123             | 32.9 ± 0.2   | 38.4 ± 1.3          |

Table S2. Change of constituent content in kudzu tissue, crude PPO (cPPO) solution, and

purified PPO (pPPO) solution

|                                   | Starch           | Protein         | Pectin          | Sucrose         |
|-----------------------------------|------------------|-----------------|-----------------|-----------------|
| Kudzu tissue (/100g tissue)       | $21.42 \pm 1.23$ | $1.42 \pm 0.18$ | $1.19 \pm 0.13$ | $1.57 \pm 0.07$ |
| cPPO solution (/100g of solution) | $0.37 \pm 0.05$  | $0.71 \pm 0.04$ | $0.51 \pm 0.02$ | $0.58 \pm 0.09$ |
| pPPO solution (/100g of solution) | — <sup>a</sup>   | $0.11 \pm 0.02$ | —               | —               |

<sup>a</sup> —, not detected.

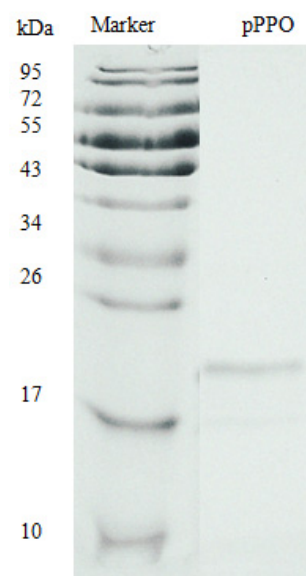

Figure S1. SDS-PAGE electrophoresis of the purified PPO

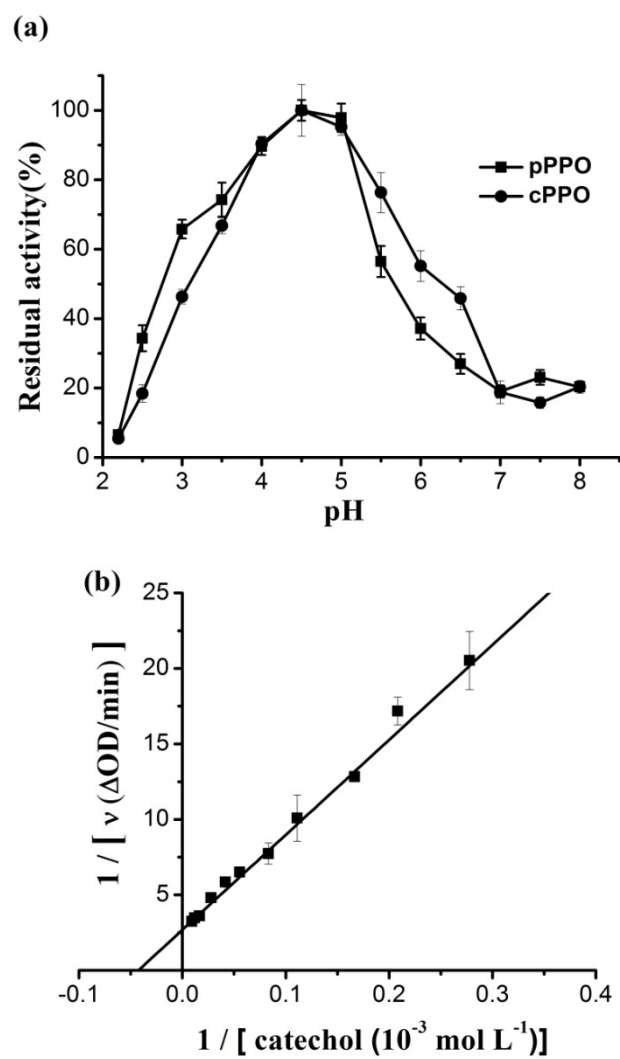

Figure S2. Effect of pH on PPO activity (a) and Lineweaver-Burk plots of PPO (b)
